# Supplementary material
Source: PubMed Central journal article supplement (PMC5633125)
Supplement: 10.1074_M117.790741_jbc.M117.790741-1.pdf [file 10.1074_M117.790741_jbc.M117.790741-1.pdf]

P2X7 receptor antagonism prevents IL-1 $\beta$  release from salivary epithelial cells and reduces inflammation in a mouse model of autoimmune exocrinopathy

**Mahmoud G. Khalafalla<sup>1,2</sup>, Lucas T. Woods<sup>1,2</sup>, Jean M. Camden<sup>1,2</sup>, Aslam A. Khan<sup>1,2</sup>, Kirsten H. Limesand<sup>3</sup>, Michael J. Petris<sup>1,2,4</sup>, Laurie Erb<sup>1,2</sup> and †Gary A. Weisman<sup>1,2</sup>**

<sup>1</sup>Department of Biochemistry, University of Missouri, Columbia, Missouri, 65211-7310 USA

<sup>2</sup>Christopher S. Bond Life Sciences Center, University of Missouri, Columbia, Missouri, 65211-7310 USA

<sup>3</sup>Department of Nutritional Sciences, University of Arizona, Tucson, Arizona, 85721 USA

<sup>4</sup>Department of Nutrition and Exercise Physiology, University of Missouri, Columbia, Missouri, 65211-7310 USA

Running title: *Role of P2X7R in Salivary Gland Inflammation*

†To whom correspondence should be addressed: Prof. Gary A. Weisman, Department of Biochemistry, 540E Life Sciences Center, 1201 Rollins Road, University of Missouri, Columbia, MO, 65211-7310, USA. Phone: 573-882-5005; Fax: 573-884-2537; E-mail: [weismang@missouri.edu](mailto:weismang@missouri.edu)

**Keywords:** ATP, inflammation, inflammasome, P2X7 receptor, salivary gland, Sjögren's syndrome.

**Figure S1**

(A)

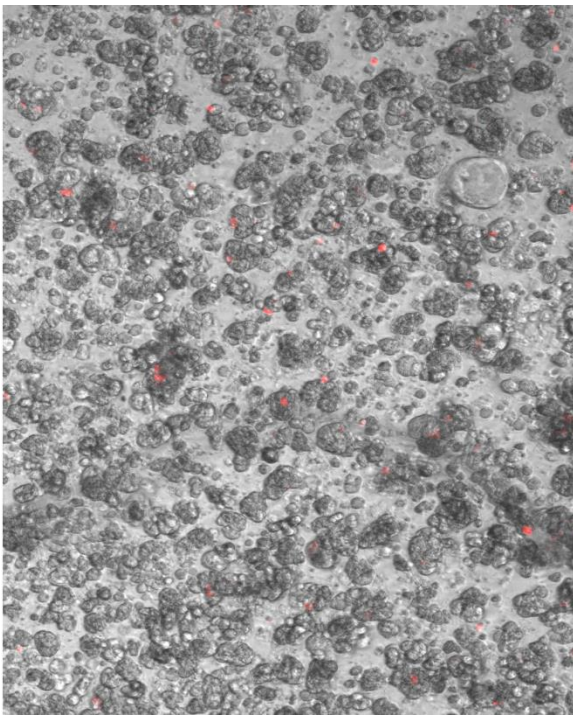

(B)

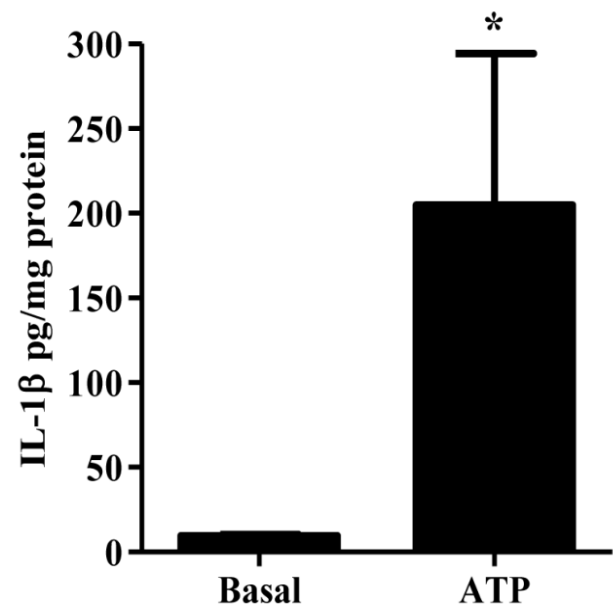

**Figure S1. ATP-induced IL-1 $\beta$  release in isolated epithelial cells**—Wild type dispersed SMG cell aggregates were suspended in PBS and non-specific antibody binding was blocked by incubation for 10 min at 4°C with anti-mouse CD16/32 antibody (1 $\mu$ g/10<sup>6</sup> cells in 100  $\mu$ l, Mouse F<sub>C</sub> block, Cat. No. 553142, BD Biosciences, San Jose, CA). Then, SMG cells were incubated for 20 min at 4°C with Alexa Fluor 594-conjugated anti-mouse CD45 antibody (1:50 dilution, clone 30-F11, Biolegend, San Diego, CA) and washed 3 times in PBS. (A) Stained cells were placed on a 8-well coverslip and fluorescence was visualized using a Nikon TI-E inverted microscope equipped with appropriate filters. Images from 3 independent SMG preparations were analyzed for immune cell contamination by counting the number of CD45<sup>+</sup> cells (red) and the total number of cells. Epithelial cell purity of SMG cell preparations was 97-99%. (B) SMG epithelial cells were enriched using the magnetic bead-based EasySep Mouse Epithelial Cell Enrichment Kit to remove hematopoietic and endothelial cells and fibroblasts. The isolated epithelial cells were stimulated with ATP (3 mM) for 90 min at 37°C and then cells were collected by centrifugation and IL-1 $\beta$  was quantified in the supernatant using the IL-1 $\beta$  Quantikine ELISA kit. Data represent means  $\pm$  S.E., where \* $P$  < 0.05 indicates a significant increase over basal levels.
